# Supplementary material for: The development of fears of compassion scale Japanese version
Source: PubMed Central journal article supplement (PMC5638239; doi:10.1371/journal.pone.0185574), 2017-10-12
Supplement: pone.0185574.s002.pdf [file pone.0185574.s002.pdf]

## Scale 2: Responding to the expression of compassion from others

- |     |                                                                                                                            |   |   |   |   |   |
|-----|----------------------------------------------------------------------------------------------------------------------------|---|---|---|---|---|
| 1.  | Wanting others to be kind to oneself is a weakness                                                                         | 0 | 1 | 2 | 3 | 4 |
| 2.  | I fear that when I need people to be kind and understanding they wont be                                                   | 0 | 1 | 2 | 3 | 4 |
| 3.  | I'm fearful of becoming dependent on the care from others because they might not always be available or willing to give it | 0 | 1 | 2 | 3 | 4 |
| 4.  | I often wonder whether displays of warmth and kindness from others are genuine                                             | 0 | 1 | 2 | 3 | 4 |
| 5.  | Feelings of kindness from others are somehow frightening                                                                   | 0 | 1 | 2 | 3 | 4 |
| 6.  | When people are kind and compassionate towards me I feel anxious or embarrassed                                            | 0 | 1 | 2 | 3 | 4 |
| 7.  | If people are friendly and kind I worry they will find out something bad about me that will change their mind              | 0 | 1 | 2 | 3 | 4 |
| 8.  | I worry that people are only kind and compassionate if they want something from me                                         | 0 | 1 | 2 | 3 | 4 |
| 9.  | When people are kind and compassionate towards me I feel empty and sad                                                     | 0 | 1 | 2 | 3 | 4 |
| 10. | If people are kind I feel they are getting too close                                                                       | 0 | 1 | 2 | 3 | 4 |
| 11. | Even though other people are kind to me, I have rarely felt warmth from my relationships with others                       | 0 | 1 | 2 | 3 | 4 |
| 12. | I try to keep my distance from others even if I know they are kind                                                         | 0 | 1 | 2 | 3 | 4 |
| 13. | If I think someone is being kind and caring towards me, I 'put up a barrier'                                               | 0 | 1 | 2 | 3 | 4 |

### Scale 3: Expressing kindness and compassion towards yourself

- |     |                                                                                                                  |   |   |   |   |   |
|-----|------------------------------------------------------------------------------------------------------------------|---|---|---|---|---|
| 1.  | I feel that I don't deserve to be kind and forgiving to myself                                                   | 0 | 1 | 2 | 3 | 4 |
| 2.  | If I really think about being kind and gentle with myself it makes me sad                                        | 0 | 1 | 2 | 3 | 4 |
| 3.  | Getting on in life is about being tough rather than compassionate                                                | 0 | 1 | 2 | 3 | 4 |
| 4.  | I would rather not know what being 'kind and compassionate to myself' feels like                                 | 0 | 1 | 2 | 3 | 4 |
| 5.  | When I try and feel kind and warm to myself I just feel kind of empty                                            | 0 | 1 | 2 | 3 | 4 |
| 6.  | I fear that if I start to feel compassion and warmth for myself, I will feel overcome with a sense of loss/grief | 0 | 1 | 2 | 3 | 4 |
| 7.  | I fear that if I become kinder and less self-critical to myself then my standards will drop                      | 0 | 1 | 2 | 3 | 4 |
| 8.  | I fear that if I am more self compassionate I will become a weak person                                          | 0 | 1 | 2 | 3 | 4 |
| 9.  | I have never felt compassion for myself, so I would not know where to begin to develop these feelings            | 0 | 1 | 2 | 3 | 4 |
| 10. | I worry that if I start to develop compassion for myself I will become dependent on it                           | 0 | 1 | 2 | 3 | 4 |
| 11. | I fear that if I become too compassionate to myself I will lose my self-criticism and my flaws will show         | 0 | 1 | 2 | 3 | 4 |
| 12. | I fear that if I develop compassion for myself, I will become someone I do not want to be                        | 0 | 1 | 2 | 3 | 4 |
| 13. | I fear that if I become too compassionate to myself others will reject me                                        | 0 | 1 | 2 | 3 | 4 |
| 14. | I find it easier to be critical towards myself rather than compassionate                                         | 0 | 1 | 2 | 3 | 4 |
| 15. | I fear that if I am too compassionate towards myself, bad things will happen                                     | 0 | 1 | 2 | 3 | 4 |
